# Supplementary material for: Synthesis of monodisperse single-crystal Cu2O spheres and their application in generating structural colors
Source: Royal Society of Chemistry journal article supplement (doi:10.1039/c9tc00809h), 2019-01-01
Supplement: c9tc00809h1.pdf [file c9tc00809h1.pdf]

Supporting Information

**Synthesis of Monodisperse Single-crystal Cu<sub>2</sub>O Spheres and their**

**Application in Generating Structural Colors**

Jiajie Bi<sup>a</sup>, Suli Wu<sup>\*a</sup>, Hongbo Xia<sup>a</sup>, Lu Li<sup>b</sup> and Shufen Zhang<sup>a</sup>

<sup>a</sup>State Key Laboratory of Fine Chemicals Dalian University of Technology, Dalian, Liaoning 116024, China. \*E-mail: wusuli@dlut.edu.cn

<sup>b</sup>University of Science and Technology, Qingdao, Shandong 266042, China. zhanglilu@126.com

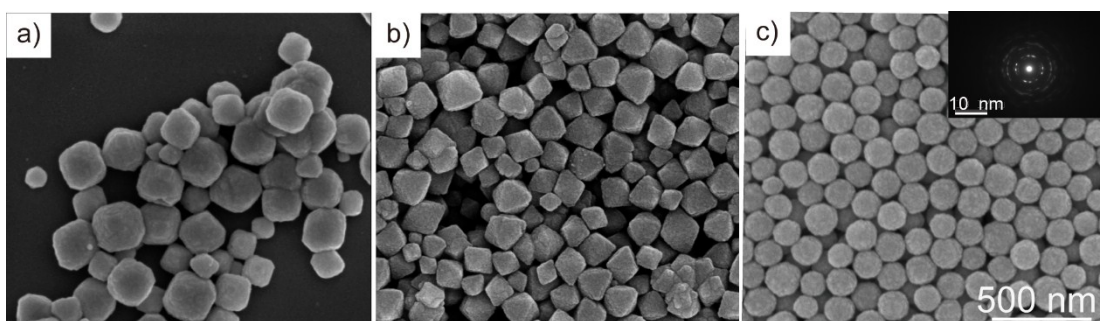

**Fig. S1.** SEM images of Cu<sub>2</sub>O with different amount of additives in different solvents (a-b) R separately is 10.3, 15.4 and H<sub>2</sub>O as solvent; (c) P = 7.7:1:1 and the solvent ratio of EG to H<sub>2</sub>O is 3.3

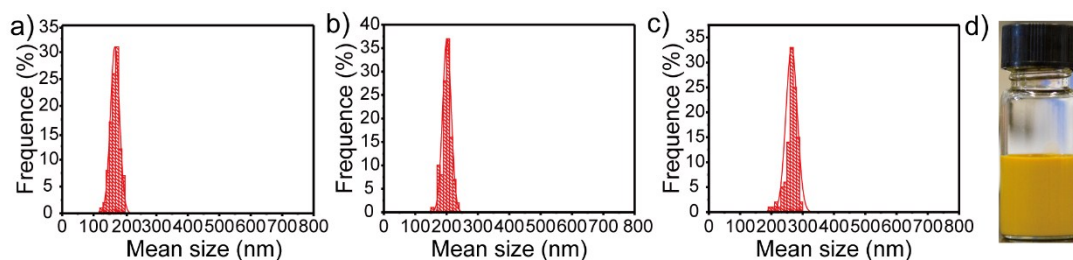

**Fig. S2.** Particle size distribution of monodisperse single-crystal solid Cu<sub>2</sub>O spheres with different size (a) 168 nm; (b) 202 nm; (c) 265 nm; d) the ethanol suspension of Cu<sub>2</sub>O single-crystal solid spheres with mass fraction 3%

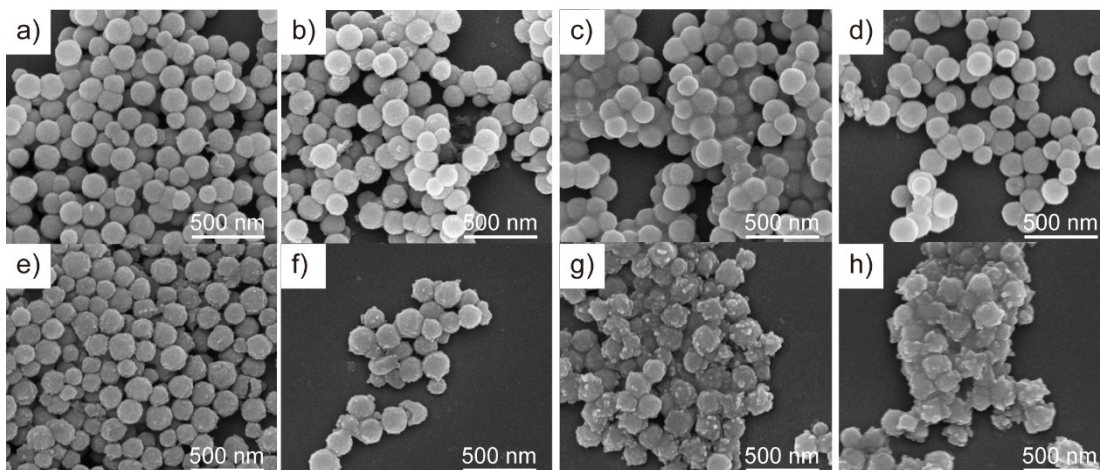

**Fig. S3** The SEM of single-crystal spheres (average diameter of 155 nm) and polycrystalline spheres (average diameter of 152 nm) were in aqueous solution with pH 10 for different times (a, e) 0 h, (b, f) 1h, (c, g) 2h, (d, h) 3h.

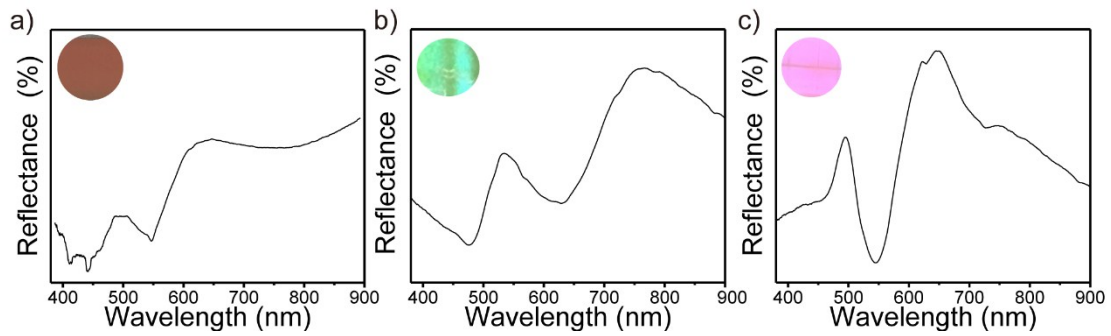

**Fig. S4** (a-c) Reflection spectra of different color films built from the 168 nm, 202 nm and 265 nm single-crystal  $\text{Cu}_2\text{O}$  solid spheres (Inset the photograph from different color films) .

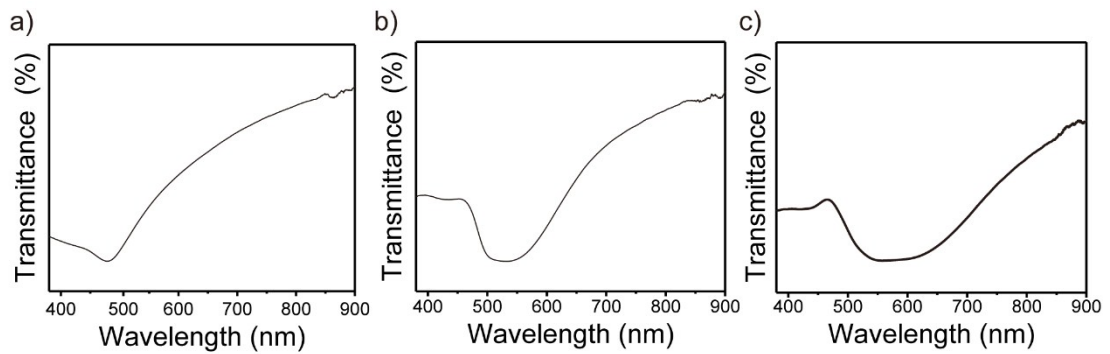

**Fig. S5** (a-c) The transmission spectra of the different color films built from the 168 nm, 202 nm and 265 nm single-crystal  $\text{Cu}_2\text{O}$  solid spheres.

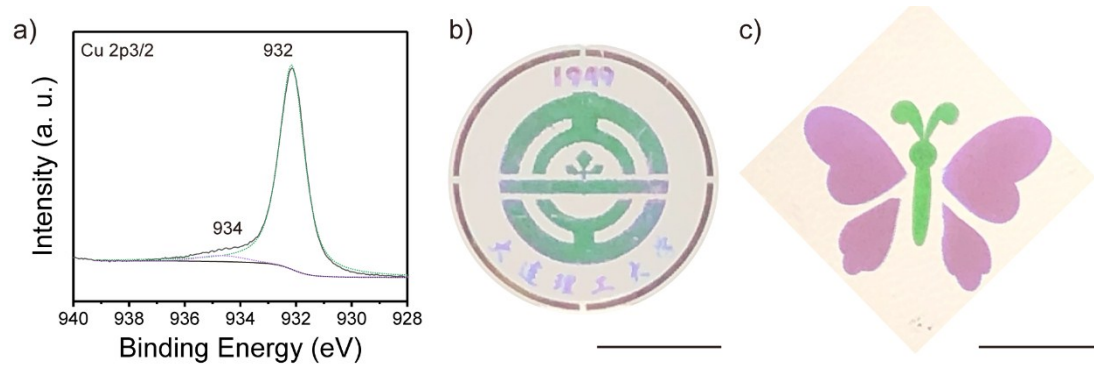

**Fig. S6** a) XPS spectra of  $\text{Cu}_2\text{O}$  spheres with a diameter of 202 nm, (b-c) The artificial structural colors of the pattern kept in air for five months, scale bars: 1 cm.
